EDITORIAL NOTE

## Editorial Note: *Lantana camara* plant extract catalyzed biosynthesis of graphene-metal nanocomposites with potential cytotoxic activities

The *PLOS One* Editors

The *PLOS One* Editors issue this Editorial Note to inform readers that PLOS has concerns about the article's authorship and about aspects of the article's peer review. After reviewing this matter PLOS concluded that the article's publication is supported based on expert input that was not affected by the concern(s).

### Reference

1. Khan KU, Rehman M, Hameed M, Hayat K, Saeed F, Afzaal M, et al. *Lantana camara* plant extract catalyzed biosynthesis of graphene-metal nanocomposites with potential cytotoxic activities. *PLoS One*. 2025;20(3):e0314850. <https://doi.org/10.1371/journal.pone.0314850> PMID: [40073028](https://pubmed.ncbi.nlm.nih.gov/40073028/)

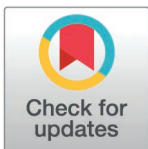

### OPEN ACCESS

**Citation:** The *PLOS One* Editors (2025) Editorial Note: *Lantana camara* plant extract catalyzed biosynthesis of graphene-metal nanocomposites with potential cytotoxic activities. *PLoS One* 20(7): e0328186. <https://doi.org/10.1371/journal.pone.0328186>

**Published:** July 14, 2025

**Copyright:** © 2025 The *PLOS One* Editors. This is an open access article distributed under the terms of the [Creative Commons Attribution License](https://creativecommons.org/licenses/by/4.0/), which permits unrestricted use, distribution, and reproduction in any medium, provided the original author and source are credited.
